## 19 **Significance and Impact of this Study**

20 This is the first ever recorded study on the *Deinococcus radiodurans* R1 biofilm. This  
21 organism, being the most radioresistant micro-organism ever known, has always been  
22 speculated as a potential bacterium to develop a bioremediation process for radioactive heavy  
23 metal contaminants. However, the lack of biofilm forming capability proved to be a bottleneck  
24 in developing such technology. This study records the first incidence of biofilm formation in a  
25 recombinant *D. radiodurans*, serendipitously, and also discusses its implications in removal of  
26 heavy-metals, such as Co and Ni.

## 27 **Abstract**

28 Radiation tolerant *Deinococcus radiodurans* R1 is reported to be a potential bacterium  
29 for the treatment of low level active wastes. So far there are no reports on the biofilm producing  
30 capability of *D. radiodurans* and heavy metal biosorption. In this study, it was observed that a  
31 recombinant *D. radiodurans* strain with a plasmid harbouring *gfp* and *kan<sup>R</sup>* has formed  
32 significant biofilm (~10 µm thick). Analysis of biofilm matrix components produced by *D.*  
33 *radiodurans* showed that the matrix consisted primarily of proteins and carbohydrates with a  
34 little amount of extracellular DNA (eDNA). Further, studies showed that *D. radiodurans*  
35 biofilm formation was enhanced at higher concentrations (up to 25 mM) of Ca<sup>2+</sup>. Further  
36 studies on *D. radiodurans* biofilm showed that Ca<sup>2+</sup> enhanced significant biosorption of the  
37 heavy metals (Co, Ni). In the presence of 25 mM Ca<sup>2+</sup>, the *D. radiodurans* (Kan<sup>r</sup>) biofilm  
38 showed 35% and 25% removal of Co<sup>2+</sup> and Ni<sup>2+</sup> respectively. While in the absence of Ca<sup>2+</sup>, *D.*  
39 *radiodurans* biofilm showed relatively low biosorption of Co (7%) and Ni (3%). Ca<sup>2+</sup> also  
40 significantly enhanced exopolysaccharide (EPS) production in the biofilm matrix. This infers  
41 that EPS could have mediated the heavy metal biosorption. This study signifies the potential  
42 use of *D. radiodurans* biofilm in the remediation of radioactive waste components.

43 **Key words:** *Deinococcus radiodurans*; Biofilms; Biosorption; Bioremediation; Cobalt;  
44 Nickel; Heavy metals.

## 45 **Introduction**

46 Biofilms are a preferred mode of life by most bacteria in nature. The biofilm is made  
47 up of a thin layer of microbes where matrices of self-made biopolymer molecules encase the  
48 cells. Biofilm mode of living provides a bacterial cell protection from environmental, chemical  
49 and physical stresses (Costerton *et al.* 1987); (Donlan 2002; Das *et al.* 2012). Biofilms apart  
50 from enhancing the organisms survival, also aids in improving the rate and the extent of  
51 contaminant transformation as compared to that of pure and planktonic cultures (Mangwani *et*  
52 *al.* 2014a). Remediation using microorganism (termed as bioremediation) is an emerging *in*  
53 *situ* technology for the clean-up of environmental pollutants. The economical factor and  
54 inefficiency of some physicochemical remediation methods has made this biological treatment  
55 method as an improved alternative (Paul *et al.* 2005). Before employing any biofilm forming  
56 bacterium for developing bioremediation process, a detailed study needs to be carried out.  
57 Previous studies have shown that biofilm parameters and EPS composition greatly affects the  
58 pollutant degradation and remediation potential (Mangwani *et al.* 2014b; Mangwani *et al.*  
59 2016). Apart from intrinsic factors such as biofilm formation and quorum sensing (Mangwani  
60 *et al.* 2012), extrinsic factors such as the presence of Ca<sup>2+</sup> also modulate the biofilms  
61 (Mangwani *et al.* 2014b; Shukla and Rao 2014) and in turn augment bioremediation capability.

62 The bioremediation potential of *D. radiodurans* has gained importance in recent times.  
63 *D. radiodurans* has an extraordinary capability of surviving under high radiation stress (Battista  
64 1997), even in low nutrient conditions (Shukla *et al.* 2014b). Engineered *D. radiodurans* cells  
65 have been used to detoxify mercury, degrade toluene (Brim *et al.* 2000) and reduce chromium  
66 (Brim *et al.* 2006). However, use of planktonic cells for bioremediation of heavy metals makes  
67 the downstream process costly or less efficient. Biofilm-mediated bioremediation processes are

68 more efficient as compared to the processes mediated by their planktonic counterparts. To use  
69 any bacterium for bioremediation purpose, the knowledge about its biofilm production  
70 characteristics is a prerequisite. Till date, there is not a single report on biofilm formation of *D.*  
71 *radiodurans*. A genetically engineered strain of *D. radiodurans*, expressing *gfp* plasmid  
72 (GenBank accession no. KF975402), was found to produce biofilm in our lab. However, the  
73 exact mechanism behind the acquired biofilm forming capability is not yet clear and is under  
74 investigation. In this study, we focus only on the characterisation of the *D. radiodurans* biofilm  
75 and its implications in the bioremediation of heavy metals.

76 Over the past few decades, rapid growth of chemical industries has enhanced the heavy  
77 metal release into the environment, leading to contamination of air, water and atmosphere  
78 (Akpor and Muchie 2010). These heavy metals need to be converted from a toxic form to a  
79 lesser hazardous form or its bioavailability should be decreased (Wall and Krumholz 2006).  
80 Naturally occurring and comparatively less abundant cobalt and nickel metals have drawn the  
81 attention due to surge in their anthropogenic activities and the potential hazards due to any  
82 accidental release into the environment (Shukla *et al.* 2017). The intake of these ions can cause  
83 detrimental health hazards (Keith *et al.* 2013). The chemical methods used for radioactive  
84 heavy metal precipitation has its limitations due to high cost and low feasibility (Shukla *et al.*  
85 2014a). Apart from the higher cost burden, most of such chemical methods for the removal of  
86 radioactive heavy metals end up with the generation of a large amounts of sludge and also  
87 incomplete removal of metal ions (Gadd 2010).

88 To overcome these disadvantages, bioremediation approaches using heavy metal  
89 resistant microorganisms like bacteria and fungus are promising due to their low cost as well  
90 as feasibility for *in situ* applications (Yan and Viraraghavan 2003; Vijayaraghavan *et al.* 2005;  
91 Pal *et al.* 2006). Bioremediation using microbes can be a very promising and more efficient  
92 approach as microbes are nature's creative recyclers (N'Guessan *et al.* 2008). It was inferred

93 that the bacteria, fungus and algae isolated from heavy metal polluted areas are the ideal  
94 candidates for the bioremediation of heavy metals (Colin *et al.* 2012). A number of studies  
95 have been carried out in order to utilize microorganisms as metal bio-sorbents (Vijayaraghavan  
96 *et al.* 2005; Pal *et al.* 2006; Paraneeiswaran *et al.* 2014), however, reports on biofilm mediated-  
97 biosorption of heavy metals are scarce.

98 In this study, *D. radiodurans* biofilm was characterised by using classical crystal violet  
99 assay and confocal laser scanning microscopy. We also studied the effect of Ca<sup>2+</sup> on biofilm  
100 formation and its EPS composition. Apart from biofilm characterisation, it was also  
101 investigated whether this recombinant strain of *D. radiodurans* can be used for biofilm  
102 mediated remediation of heavy metals.

## 103 **Materials & Methods**

### 104 **Microorganism and culture conditions**

105 *Deinococcus radiodurans* R1 wild type (DR1-WT) and *gfp*-harbouring, biofilm  
106 forming strain of *D. radiodurans* (DR1-Kan<sup>r</sup>) was used in this study. Both the strain of *D.*  
107 *radiodurans* were maintained on TGY (tryptone-glucose-yeast extract) medium consisting of  
108 5 g tryptone, 3 g yeast extract, 1 g glucose and 1.5% agar was added to prepare solid medium  
109 for sub-culturing and culture purity study. The inoculated TGY broth cultures were incubated  
110 at 30°C in an orbital shaker at 100 rpm until mid-log phase was reached. Kanamycin antibiotic  
111 was added in the TGY at final concentration of 5 µg/mL for the growth of *D. radiodurans*  
112 (Kan<sup>r</sup>).

### 113 **Quantitative biofilm assay**

114 Biofilm assay was performed to assess biofilm production by *D. radiodurans* strains.  
115 Biofilm quantification was done by an improved method of classical crystal violet assay  
116 (Shukla and Rao 2017). The overnight grown cultures of the *D. radiodurans* strains in TGY  
117 were diluted 1:40 in sterile TGY medium and added to the pre-sterilized flat bottom

118 polystyrene 96 well micro-titre plates. After the prescribed time as per the experimental plan,  
119 biofilms were gently washed with 200  $\mu$ l of sterile phosphate buffer saline (PBS) and stained  
120 with 0.2% crystal violet solution for 5 min. Thereafter, the excess crystal violet was decanted  
121 and biofilms were washed again with PBS twice. Crystal violet was solubilised with 95%  
122 alcohol and biofilm quantification was done in terms of absorbance at 570 nm using a  
123 multimode micro-plate reader (BioTek, USA).

124 To study the effect of calcium on *D. radiodurans* (Kan<sup>r</sup>) biofilm growth, the biofilm  
125 was grown as described above but in the presence of different concentrations of CaCl<sub>2</sub> in the  
126 range of 1 -50 mM in TGY broth for 48 h. *D. radiodurans* (Kan<sup>r</sup>) in TGY broth without Ca<sup>2+</sup>  
127 served as control, and TGY broth alone considered as blank. Biofilm growth was monitored  
128 using crystal violet assay as described above.

### 129 **Confocal laser scanning microscopy (CSLM) studies and image analysis**

130 Biofilms grown on pre-sterilized microscopic glass slides were studied using CSLM  
131 (Mangwani *et al.* 2014b). The overnight grown culture of the *D. radiodurans* (Kan<sup>r</sup>) was  
132 diluted 1:40 in sterile TGY medium and added to the pre-sterilized flat bottom 6 well plates.  
133 Sterile glass slides were immersed into the growth medium as a substratum for biofilm growth.  
134 The petri-plates were incubated at 80 rpm for 48 h at 30°C. The glass slides were gently  
135 washed with PBS to remove loosely attached cells and stained with 0.2 % acridine orange for  
136 5 min, thereafter the slide is thoroughly washed with PBS. A thin cover slide was mounted  
137 over the stained biofilm and observed by keeping the slide upside down on objective lens of  
138 the confocal laser scanning microscope (TCS SP2 AOBS) equipped with DM IRE 2-inverted  
139 microscope (Leica Microsystems, Germany). Image stacks were collected from 20 random  
140 points of the biofilms in order to get an accurate mean value of the biofilm parameters.  
141 Quantification of the biofilm parameters (average thickness, maximum thickness, total  
142 biomass, roughness coefficient, and surface to biovolume ratio) was done by COMSTAT

143 program written as a script in MATLAB 5.2 software (Heydorn *et al.* 2000). Each experiment  
144 was repeated three times to have statistically significant data.

#### 145 **EPS extraction and quantification of biofilm matrix components**

146 *Deinococcus radiodurans* (Kan<sup>r</sup>) biofilm was grown for 48 h on glass slides immersed  
147 in 20 ml of TGY. After 48 h, planktonic cells were aspirated and biofilm was gently washed  
148 twice with PBS, and then remaining biofilm was scrapped and collected in 5 ml of PBS.  
149 Biofilm was disintegrated by gentle vortexing using glass beads. A 5 ml of the biofilm sample  
150 was centrifuged at 8000 rpm and 4°C for 30 min. Supernatant was collected and mixed with  
151 double volume of 90% chilled ethanol and kept at 4°C overnight. EPS was collected by  
152 centrifugation at 10000 rpm and 4°C for 10 min. The supernatant was discarded and pellet  
153 was collected and dried at 60°C to remove ethanol. Pellet was resuspended in 100 µl PBS  
154 buffer. The protein and eDNA content in the resuspension was quantified using Qubit  
155 Fluorimeter (Invitrogen, Carlsbad, CA, USA), the quantification protocol was followed as  
156 described by the vendor (Beaudet *et al.* 2007; Bajrami *et al.* 2009). Glucose concentration as  
157 a measure of polysaccharide content was quantified by the Dubois method as described  
158 elsewhere (Paraneeiswaran *et al.* 2015).

#### 159 **Biofilm-mediated heavy metal removal**

160 *Deinococcus radiodurans* (Kan<sup>r</sup>) was grown in TGY broth in the presence of Ca<sup>2+</sup> (25  
161 mM Ca<sup>2+</sup>) and incubated for 48 h. Biofilm with 25 mM Ca<sup>2+</sup> was taken in a total volume of  
162 200 µl sterile TGY broth in 96 well microtitre plate. After incubation, the heavy metals such  
163 as Cobalt and Nickel were added. The TGY broth with heavy metals (Co<sup>2+</sup> and Ni<sup>2+</sup>) was  
164 considered as control. After 24 h of incubation, the supernatants were collected from the well  
165 of plates. The supernatant was filtered through 0.22 µm membrane filter. Then the  
166 concentrations of heavy metals (Co<sup>2+</sup> and Ni<sup>2+</sup>) present in the collected supernatants was

167 analysed using Inductively Coupled Plasma-Atomic Emission Spectroscopy (ICP-AES, model:  
168 Ultima-2, Horiba JovinYvon, France).

## 169 **Statistical analysis**

170 All data are expressed as mean standard deviation (SD) of the triplicate experimental  
171 data. A two-tailed Student's t-test was used to determine the differences in biofilm formation  
172 between the control and each group. The P value of < 0.05 was taken as significant.

## 173 **Results**

### 174 **Biofilm formation of by *D. radiodurans***

175 Biofilm growth capabilities of *D. radiodurans* R1 wild type and *D. radiodurans* (Kan<sup>r</sup>)  
176 were studied in two growth media, *i.e.*, LB and TGY by using classical crystal violet assay in  
177 96 well microtitre plates (Fig. 1). Biofilm production was quantified at different time intervals  
178 at 24, 48, and 72 h. Results showed that *D. radiodurans* (Kan<sup>r</sup>) formed a good amount of  
179 biofilm as compared to *D. radiodurans* R1 wild type in both the growth medium. As shown in  
180 Fig. 1, a gradual increase was observed in *D. radiodurans* (Kan<sup>r</sup>) biofilm formation up to 72 h  
181 when grown in LB medium. On the other hand, maximum biofilm growth was observed after  
182 48 h when the biofilm was grown in the presence of TGY medium. However, there was no  
183 significant difference in biofilm production at 48 h and 72 h. It can also be observed in Fig. 1A  
184 and 1B, that *D. radiodurans* (Kan<sup>r</sup>) biofilm growth was much better in TGY medium when  
185 compared to LB at all the time intervals monitored *i.e.*, 24, 48 and 72 h. Biofilm growth in  
186 TGY after 24, 48 and 72 h was found to be 44.8%, 75.9% and 34.34% higher as compared to  
187 LB medium. This observation indicated that TGY is the medium of choice for all biofilm  
188 related experiments.

### 189 **Confocal laser scanning microscopic study of *D. radiodurans* (Kan<sup>r</sup>) biofilm**

190 Confocal laser scanning microscopic study of the *gfp* tagged *D. radiodurans* (Kan<sup>r</sup>)  
191 biofilm was done at 24 h, 48 h and 72 h to characterize the biofilm parameters. As shown in



192 Table 1, biofilm parameters of *D. radiodurans* biofilm significantly changed over the time.  
193 Maximum biomass, average thickness of biofilm and average colony size at substratum were  
194 observed at 48 h. Total biomass ( $\mu\text{m}^3/\mu\text{m}^2$ ) at 24 h, 48 h and 72 h was found to be  $0.53 \pm 0.34$ ,  
195  $1.63 \pm 1.08$  and  $0.87 \pm 0.65$  respectively. Total biomass is positively correlated with the average  
196 thickness of biofilms. For *D. radiodurans* (Kan<sup>r</sup>) biofilm,  $R^*$  was found to be lowest at 48 h  
197 and surface to bio-volume ratio was found to be maximum at 48 h as compared to 24 and 72 h.

### 198 **Effect of Ca<sup>2+</sup> on *D. radiodurans* biofilm formation and EPS production**

199 The effect of Ca<sup>2+</sup> on *D. radiodurans* (Kan<sup>r</sup>) biofilm growth was studied. The result  
200 showed that there was a significant increase in the *D. radiodurans* (Kan<sup>r</sup>) biofilm production  
201 with increasing concentration of Ca<sup>2+</sup>, when tested in the range of 1 - 50 mM (Fig. 3). Calcium  
202 enhanced the biofilm growth in a dose dependent manner. Optimum Ca<sup>2+</sup> concentration for  
203 enhancing biofilm production was found to be 25 mM without causing substantial turbidity in  
204 TGY medium.

205 To assess the effect of Ca<sup>2+</sup> on EPS matrix the *D. radiodurans* (Kan<sup>r</sup>) biofilm was grown  
206 with and without Ca<sup>2+</sup> and its EPS was extracted and evaluated for its composition. Results  
207 indicated that in the presence of 25 mM Ca<sup>2+</sup> in TGY medium for the *D. radiodurans* (Kan<sup>R</sup>)  
208 biofilm growth had a substantial effect on the composition of the biofilm matrix. Fig. 4A shows  
209 that there was a considerable increase in the protein content, however, the increase was not  
210 statistically significant ( $P > 0.05$ ). Results also show that there was a slight decrease in the total  
211 eDNA (Fig. 4B), which was also found to be statistically insignificant ( $P > 0.05$ ). On the  
212 contrary, the production of exopolysaccharide, which was indirectly estimated in terms of total  
213 glucose concentration present in the EPS, was significantly enhanced ( $P < 0.05$ ), when *D.*  
214 *radiodurans* (Kan<sup>r</sup>) biofilm was grown in the presence of Ca<sup>2+</sup> as compared with the control  
215 (Fig. 4C).

### 216 **Heavy metal remediation by *D. radiodurans* (Kan<sup>r</sup>) biofilm**

217 *Deinococcus radiodurans* (Kan<sup>r</sup>) biofilm was grown for 48 h in the presence (test) and  
218 without 25 mM Ca<sup>2+</sup> (control). Thereafter, the 48 h old biofilm was treated with 1 ppm aqueous  
219 solution of Co<sup>2+</sup> and Ni<sup>2+</sup>. After 24 h of contact time, the supernatant samples were collected  
220 and Co<sup>2+</sup> and Ni<sup>2+</sup> concentration was analysed for the heavy metal presence using ICP-AES.  
221 Results showed that there was very less removal of Co<sup>2+</sup> (~7%) and Ni<sup>2+</sup> (~3%) by the *D.*  
222 *radiodurans* (Kan<sup>r</sup>) biofilm, when grown without Ca<sup>2+</sup> in the growth medium (Fig. 5).  
223 Interestingly, when *D. radiodurans* (Kan<sup>r</sup>) biofilm was grown in the presence of Ca<sup>2+</sup>, it  
224 developed significant ability to remove both the heavy metals. In the presence of Ca<sup>2+</sup>, *D.*  
225 *radiodurans* (Kan<sup>r</sup>) biofilm could remove ~35% Co<sup>2+</sup> and 25% Ni<sup>2+</sup> from the 1 ppm of aqueous  
226 solution (Fig. 5). Therefore, approximately 5 fold increase was observed in Co<sup>2+</sup> uptake  
227 potential, whereas ~11.3 fold increase was observed in Ni<sup>2+</sup> uptake due to the presence of Ca<sup>2+</sup>.

## 228 Discussion

229 Nuclear industries generate radioactive heavy metal containing activated corrosion  
230 products such as <sup>51</sup>Cr, <sup>59</sup>Fe, <sup>58</sup>Co, <sup>65</sup>Zn, <sup>54</sup>Mn and <sup>60</sup>Co in wastes. Among the many radioactive  
231 heavy metals, <sup>60</sup>Co is the most significant radioisotopes present in the activated corrosion  
232 products due to its longer half-life (5.26 Years) (Charlesworth 1971). To develop any  
233 bioremediation process to remove such radioactive element the organism needs to be highly  
234 radio-tolerant which can not only survive but can grow in chronic radiation exposure. Studies  
235 have shown that *D. radiodurans* can survive in chronic exposure of radiation, making it the  
236 most desirable bacterium to develop any bioremediation process to deal with radioactive waste.  
237 However, *D. radiodurans* R1 wild type does not form biofilm which limits its use in  
238 bioremediation despite having extreme radio-tolerance and heavy metal tolerance.  
239 *Deinococcus geothermalis*, another member of radio-tolerant *Deinococci* family, is another  
240 potential organism to develop bioremediation of radioactive heavy metals. Although few  
241 studies have shown the *D. geothermalis* forms biofilm (Kolari *et al.* 2002), but no study has

242 indicated its potential application in bioremediation. Moreover, optimum temperature for *D.*  
243 *geothermalis* growth is 50°C which is not a feasible condition to maintain *in situ* applications  
244 (Makarova *et al.* 2007). On the other hand, many reports are available in the literature which  
245 shows promising potential in *D. radiodurans* as an ideal bioremediation candidate. Apart from  
246 having high heavy metal tolerance and radio-resistance, optimum growth condition for *D.*  
247 *radiodurans* is 30-32°C which implies that it is fit for radionuclides bioremediation  
248 applications *in situ* at ambient temperature. The only bottleneck in its large scale application is  
249 its incapability to form biofilm, which is a prerequisite for a large scale bioreactor design and  
250 applications. In this study, serendipitously, a recombinant strain of *D. radiodurans* harbouring  
251 a plasmid with a *gfp* and *kan<sup>R</sup>* genes found to have a significant biofilm producing property.  
252 The underlying reason behind this observation is not yet understood and is still under  
253 investigation. However, in this study, we have focused mainly on characterisation of the *D.*  
254 *radiodurans* biofilm and its investigating its putative role in bioremediation of heavy metals.

255 In general, most of the model biofilm producing organisms such as *Escherichia coli*,  
256 *Staphylococcus sp.*, *Pseudomonas aeruginosa* complete a full biofilm cycle, *i.e.*, initial  
257 adhesion, irreversible adhesion, micro-colony formation, biofilm maturation followed by a  
258 dispersal phase, in 24 h under limited nutrient conditions in microtitre plate (Shukla and Rao  
259 2014; Shukla *et al.* 2017). Doubling time for *D. radiodurans* is 1.5 h (Chen *et al.* 2009) as  
260 compared to 30-40 min for *E. coli* (Plank and Harvey 1979). Being a slow growing organism  
261 *D. radiodurans* showed the maximum biofilm at 48 h and dispersal phase was observed after  
262 72 h. This observation also implicates that 48 h should be optimum time for developing any  
263 biofilm-mediated bioremediation process, when the process has to be performed under limited  
264 nutrient conditions or in batches.

265 Confocal laser scanning microscopic study of the *gfp* tagged *D. radiodurans* (*Kan<sup>r</sup>*)  
266 biofilm was done at 24 h, 48 h and 72 h to characterize biofilm parameters, such as total

267 biomass, maximum and average thickness, average colony size, roughness coefficient, and  
268 surface to biovolume ratio. GFP fluorescence was used to image *D. radiodurans* (Kan<sup>r</sup>)  
269 biofilms. Various biofilm parameters were analysed from the 3D image stacks using  
270 COMSTAT software (Heydorn *et al.* 2000). Biofilm with high roughness coefficient ( $R^*$ )  
271 indicates the ability of biofilm growth through micro-colonies (Shukla and Rao 2013). For *D.*  
272 *radiodurans* (Kan<sup>r</sup>) biofilm,  $R^*$  was found to be lowest at 48 h as compared to 24 and 72 h,  
273 indicating more homogeneous biofilm growth across the surface. Whereas, surface to bio-  
274 volume ratio, which indicate that how much biofilm surface is exposed to bulk liquid, was  
275 found to be maximum at 48 h. These both parameters (low  $R^*$  and high surface to volume  
276 ratio) suggest the higher availability for surface-mediated bioremediation process such as  
277 biosorption *etc.* As most of the biofilm parameter were found to be suitable as far as biofilm  
278 mediated bioremediation is concerned, 48 h old biofilm was chosen for further experiments.

279 In general extracellular  $Ca^{2+}$  plays an important role in maintaining the integrity of the  
280 cell wall and strengthening the biofilm matrix by cross-linking the extracellular polymeric  
281 substances and sometimes enhances the EPS production. The biofilm matrix, *i.e.*, EPS is  
282 comprised of mainly exopolysaccharide, proteins, and extracellular DNA (eDNA)(Flemming  
283 and Wingender 2010). It was hypothesized that the presence of higher concentration of  $Ca^{2+}$   
284 ions can increase the production of EPS by *D. radiodurans* (Kan<sup>r</sup>). There are many reports on  
285 effect of  $Ca^{2+}$  on biofilm growth, architecture and production of extracellular matrix, especially  
286 on synthesis of exopolysaccharides (Patrauchan *et al.* 2005; Shukla and Rao 2013; Mangwani  
287 *et al.* 2014b; Shukla and Rao 2014). EPS production and composition, in turn, greatly influence  
288 the bioremediation capacity of microbial biofilms (Mangwani *et al.* 2014b; Mangwani *et al.*  
289 2016). Earlier laboratory studies had shown that presence of  $Ca^{2+}$  enhanced the  
290 exopolysaccharide (EPS) production in biofilm in some bacteria (Mangwani *et al.* 2014b).

291 Having shown a very good biofilm forming potential, *D. radiodurans* (Kan<sup>r</sup>) biofilm  
292 was tested for the heavy metal removal capacity, when grown with and without the presence  
293 of Ca<sup>2+</sup>. As shown in the Fig. 5, fold increase was observed in Co<sup>2+</sup> uptake potential, whereas  
294 ~11.3 fold increase was observed in Ni<sup>2+</sup> uptake, when the biofilm was grown in the presence  
295 of Ca<sup>2+</sup>. As previously shown in the Fig. 4, there was a significant enhancement in the  
296 production of exopolysaccharides in the *D. radiodurans* biofilm matrix due to the presence of  
297 Ca<sup>2+</sup>. Therefore, it is speculated that enhanced exopolysaccharides production, which is largely  
298 negatively charged biomolecule can aid in biosorption of positively charged heavy metals such  
299 as Co<sup>2+</sup> and Ni<sup>2+</sup>.

300 Biofilms are ideal for bioremediation purpose as they need not to be separated from the  
301 bulk liquid waste, thus making the whole process more economic and feasible (Shukla *et al.*  
302 2017). Biofilm mediated bioremediation is an ideal process by a radio-tolerant microbial  
303 biofilm to ease its further downstream processing. For example, bio-precipitation of aqueous  
304 U(VI) to insoluble uranyl phosphate precipitates are not susceptible for re-oxidation in contrast  
305 to the chemically ‘reduced’ uranium mineral like uraninite which has the tendency to re-oxidise  
306 back to more soluble U(VI) (Kulkarni *et al.* 2013). Few studies using bioengineered *E. coli*,  
307 with Ni/Co transporter (NiCoT) genes showed successful removal of trace cobalt (\*Co) from  
308 aqueous solutions (Raghu *et al.* 2008; Duprey *et al.* 2014). However, these recombinant *E. coli*  
309 strains did not survive beyond 20-Gy radiation exposure, limiting its use in the treatment of  
310 radioactive waste. Another study with recombinant *D. radiodurans* with cloned NiCoT genes  
311 showed higher potential of Co<sup>2+</sup> removal which was ~60% removal from 8.5 nM Co<sup>2+</sup> solution,  
312 *i.e.* removal of ~5.1 nM Co<sup>2+</sup> (Gogada *et al.* 2015). The present study was carried out using 1  
313 ppm (5.9 mM Co<sup>2+</sup> solution) which was 1000 times concentrated and showed 35% removal of  
314 the Co<sup>2+</sup> *i.e.*, 2 mM. In other words, in this study, *D. radiodurans* (Kan<sup>R</sup>) biofilm-mediated  
315 Co<sup>2+</sup> removal method proved to be ~400 fold more efficient.

## 316 **Conclusion**

317 This study is the first ever report on *D. radiodurans* biofilm as well as biofilm-mediated  
318 heavy-metals remediation. *D. radiodurans* is a potential candidate for the treatment of low  
319 level radioactive waste material, because of its high tolerance to radiation. The biofilm  
320 formation by a recombinant strain of *D. radiodurans* was optimized and characterized. This  
321 study also supports the fundamental role of Ca<sup>2+</sup> in biofilm growth, architecture as well as  
322 biofilm-mediated heavy metal remediation. Results of this study showed that Ca<sup>2+</sup> enhances  
323 the EPS production in *D. radiodurans* biofilm which modulated the biosorption capability and  
324 enhanced the removal of heavy metals (Cobalt and Nickel). Based on this study, it can be  
325 inferred that bioremediation of radioactive waste can be achieved by *D. radiodurans* biofilm.

## 326 **Conflict of interests**

327 Authors of the manuscript declare no conflict of interest.

## 328 **Acknowledgements**

329 Authors thank Dr. Abdul Nishad P., Water and Steam Chemistry Division, BARC facilities,  
330 Kalpakkam, for providing the ICP-AES facility.

## 331 **References**

332 Akpor, O. and Muchie, M. (2010) Remediation of heavy metals in drinking water and  
333 wastewater treatment systems: Processes and applications. *Int J Phys Sci* **5**, 1807-1817.

334

335 Bajrami, B., Shi, Y., Lapierre, P. and Yao, X. (2009) Shifting unoccupied spectral space in  
336 mass spectrum of peptide fragment ions. *J Am Soc Mass Spectrom* **20**, 2124-2134.

337

338 Battista, J.R. (1997) Against all odds: the survival strategies of *Deinococcus radiodurans*. *Annu*  
339 *Rev Microbiol* **51**, 203-224.

340

- 341 Beaudet, M.P., Ahnert, N., Dallwig, J.A., Goodman, T. and Thomas, J.A. (2007) A fast, easy,  
342 accurate method for protein quantitation. *FASEB J* **21**, A1006-A1007.
- 343
- 344 Brim, H., McFarlan, S.C., Fredrickson, J.K., Minton, K.W., Zhai, M., Wackett, L.P. and Daly,  
345 M.J. (2000) Engineering *Deinococcus radiodurans* for metal remediation in radioactive mixed  
346 waste environments. *Nat Biotechnol* **18**, 85-90.
- 347 Brim, H., Osborne, J.P., Kostandarithes, H.M., Fredrickson, J.K., Wackett, L.P. and Daly, M.J.  
348 (2006) *Deinococcus radiodurans* engineered for complete toluene degradation facilitates Cr  
349 (VI) reduction. *Microbiology* **152**, 2469-2477.
- 350
- 351 Charlesworth, D. (1971) Water reactor plant contamination and decontamination  
352 requirements—a survey. In *Proc Am Power Conf.* pp.749-756.
- 353
- 354 Chen, H., Huang, L., Hua, X., Yin, L., Hu, Y., Wang, C., Chen, W., Yu, X., Xu, Z. and Tian,  
355 B. (2009) Pleiotropic effects of RecQ in *Deinococcus radiodurans*. *Genomics* **94**, 333-340.
- 356
- 357 Colin, V.L., Villegas, L.B. and Abate, C.M. (2012) Indigenous microorganisms as potential  
358 bioremediators for environments contaminated with heavy metals. *Int Biodeterior*  
359 *Biodegradation* **69**, 28-37.
- 360
- 361 Costerton, J.W., Cheng, K., Geesey, G.G., Ladd, T.I., Nickel, J.C., Dasgupta, M. and Marrie,  
362 T.J. (1987) Bacterial biofilms in nature and disease. *Annu Rev Microbiol* **41**, 435-464.
- 363
- 364 Das, N., Geetanjali Basak, L., Salam, J.A. and Abigail, M. (2012) Application of biofilms on  
365 remediation of pollutants—an overview. *J Microbiol Biotechnol Res* **2**, 783-790.

366

367 Donlan, R.M. (2002) Biofilms: microbial life on surfaces. *Emerg Infect Dis* **8**.

368

369 Duprey, A., Chansavang, V., Frémion, F., Gonthier, C., Louis, Y., Lejeune, P., Springer, F.,

370 Desjardin, V., Rodrigue, A. and Dorel, C. (2014) “NiCo Buster”: engineering *E. coli* for fast

371 and efficient capture of cobalt and nickel. *J Biol Eng* **8**, 19.

372

373 Flemming, H.-C. and Wingender, J. (2010) The biofilm matrix. *Nat Rev Microbiol* **8**, 623-633.

374

375 Gadd, G.M. (2010) Metals, minerals and microbes: geomicrobiology and bioremediation.

376 *Microbiology* **156**, 609-643.

377

378 Gogada, R., Singh, S.S., Lunavat, S.K., Pamarthi, M.M., Rodrigue, A., Vadivelu, B., Phanithi,

379 P.-B., Gopala, V. and Apte, S.K. (2015) Engineered *Deinococcus radiodurans* R1 with NiCoT

380 genes for bioremoval of trace cobalt from spent decontamination solutions of nuclear power

381 reactors. *Appl Microbiol Biotechnol* **99**, 9203-9213.

382

383 Heydorn, A., Nielsen, A.T., Hentzer, M., Sternberg, C., Givskov, M., Ersbøll, B.K. and Molin,

384 S. (2000) Quantification of biofilm structures by the novel computer program COMSTAT.

385 *Microbiology* **146**, 2395-2407.

386

387 Keith, S., Faroon, O., Roney, N., Scinicariello, F., Wilbur, S., Ingerman, L., Lladós, F., Plewak,

388 D., Wohlers, D. and Diamond, G. (2013) *Toxicological profile for uranium*: Agency for Toxic

389 Substances and Disease Registry (US), Atlanta (GA).

390



391 Kolari, M., Schmidt, U., Kuismanen, E. and Salkinoja-Salonen, M. (2002) Firm but slippery  
392 attachment of *Deinococcus geothermalis*. *J Bacteriol* **184**, 2473-2480.

393

394 Kulkarni, S., Ballal, A. and Apte, S.K. (2013) Bioprecipitation of uranium from alkaline waste  
395 solutions using recombinant *Deinococcus radiodurans*. *J Hazard Mat* **262**, 853-861.

396 Makarova, K.S., Omelchenko, M.V., Gaidamakova, E.K., Matrosova, V.Y., Vasilenko, A.,

397 Zhai, M., Lapidus, A., Copeland, A., Kim, E. and Land, M. (2007) *Deinococcus geothermalis*:  
398 the pool of extreme radiation resistance genes shrinks. *PLoS One* **2**, e955.

399

400 Mangwani, N., Dash, H.R., Chauhan, A. and Das, S. (2012) Bacterial quorum sensing:  
401 functional features and potential applications in biotechnology. *J Mol Microbiol Biotechnol* **22**,  
402 215-227.

403

404 Mangwani, N., Shukla, S., Kumari, S., Rao, T. and Das, S. (2014a) Characterization of  
405 *Stenotrophomonas acidaminiphila* NCW-702 biofilm for implication in the degradation of  
406 polycyclic aromatic hydrocarbons. *J Appl Microbiol* **117**, 1012-1024.

407

408 Mangwani, N., Shukla, S.K., Kumari, S., Das, S. and Rao, T.S. (2016) Effect of biofilm  
409 parameters and extracellular polymeric substance composition on polycyclic aromatic  
410 hydrocarbon degradation. *RSC Advances* **6**, 57540-57551.

411

412 Mangwani, N., Shukla, S.K., Rao, T.S. and Das, S. (2014b) Calcium-mediated modulation of  
413 *Pseudomonas mendocina* NR802 biofilm influences the phenanthrene degradation. *Colloids*  
414 *Surf B* **114**, 301-309.

415

- 416 N'Guessan, A.L., Vrionis, H.A., Resch, C.T., Long, P.E. and Lovley, D.R. (2008) Sustained  
417 removal of uranium from contaminated groundwater following stimulation of dissimilatory  
418 metal reduction. *Environ Sci Technol* **42**, 2999-3004.
- 419
- 420 Pal, A., Ghosh, S. and Paul, A. (2006) Biosorption of cobalt by fungi from serpentine soil of  
421 Andaman. *Bioresour Technol* **97**, 1253-1258.
- 422
- 423 Paraneeiswaran, A., Shukla, S.K., Prashanth, K. and Rao, T.S. (2015) Microbial reduction of  
424 [Co (III)-EDTA]- by *Bacillus licheniformis* SPB-2 strain isolated from a solar salt pan. *J*  
425 *Hazard Mat* **283**, 582-590.
- 426
- 427 Paraneeiswaran, A., Shukla, S.K., Rao, T.S. and Prashanth, K. (2014) Removal of toxic Co-  
428 EDTA complex by a halophilic solar-salt-pan isolate *Pseudomonas aeruginosa* SPB-1.  
429 *Chemosphere* **95**, 503-510.
- 430
- 431 Patrauchan, M., Sarkisova, S., Sauer, K. and Franklin, M. (2005) Calcium influences cellular  
432 and extracellular product formation during biofilm-associated growth of a marine  
433 *Pseudoalteromonas* sp. *Microbiology* **151**, 2885-2897.
- 434
- 435 Paul, D., Pandey, G., Pandey, J. and Jain, R.K. (2005) Accessing microbial diversity for  
436 bioremediation and environmental restoration. *Trends Biotechnol* **23**, 135-142.
- 437
- 438 Plank, L. and Harvey, J. (1979) Generation time statistics of *Escherichia coli* B measured by  
439 synchronous culture techniques. *Microbiology* **115**, 69-77.
- 440

- 441 Raghu, G., Balaji, V., Venkateswaran, G., Rodrigue, A. and Mohan, P.M. (2008)  
442 Bioremediation of trace cobalt from simulated spent decontamination solutions of nuclear  
443 power reactors using *E. coli* expressing NiCoT genes. *Appl Microbiol Biotechnol* **81**, 571-578.
- 444 Shukla, S.K., Mangwani, N., Karley, D. and Rao, T.S. (2017) Bacterial Biofilms and Genetic  
445 Regulation for Metal Detoxification. In *Handbook of Metal-Microbe Interactions and*  
446 *Bioremediation* eds. Surajit Das and Dash, H.R.: CRC press.
- 447
- 448 Shukla, S.K., Mangwani, N., Rao, T.S. and Das, S. (2014a) 8–Biofilm-Mediated  
449 Bioremediation of Polycyclic Aromatic Hydrocarbons. *Microbial Biodegradation and*  
450 *Bioremediation*, 203-232.
- 451
- 452 Shukla, S.K. and Rao, T.S. (2013) Effect of calcium on *Staphylococcus aureus* biofilm  
453 architecture: A confocal laser scanning microscopic study. *Colloids Surf B* **103**, 448-454.
- 454
- 455 Shukla, S.K. and Rao, T.S. (2014) Calcium-Mediated Modulation of Staphylococcal Bacterial  
456 Biofilms. *Indian J Geomarine Sci* **43**, 2107-2117
- 457
- 458 Shukla, S.K. and Rao, T.S. (2017) An Improved Crystal Violet Assay for Biofilm  
459 Quantification in 96-Well Microtitre Plate. *bioRxiv*, 100214.
- 460
- 461 Shukla, S.K., Sankar, G.G., Paraneeiswaran, A. and Rao, T.S. (2014b) Differential radio-  
462 tolerance of nutrition-induced morphotypes of *Deinococcus radiodurans* R1. *Curr Microbiol*  
463 **68**, 247-253.
- 464

465 Vijayaraghavan, K., Jegan, J., Palanivelu, K. and Velan, M. (2005) Biosorption of cobalt (II)  
466 and nickel (II) by seaweeds: batch and column studies. *Sep Purif Technol* **44**, 53-59.

467

468 Wall, J.D. and Krumholz, L.R. (2006) Uranium reduction. *Annu Rev Microbiol* **60**, 149-166.

469

470 Yan, G. and Viraraghavan, T. (2003) Heavy-metal removal from aqueous solution by fungus

471 *Mucor rouxii*. *Water Res* **37**, 4486-4496.

472

473

## Legends to the Figures and Table

474 **Table 1:** Structural parameters of *D. radiodurans* (Kan<sup>r</sup>) biofilms in TGY medium at different  
475 days. Biofilm parameters were quantified from the CSLM images stacks.

476 **Figure 1.** Biofilm formation by *D. radiodurans* R1 wild type and *D. radiodurans* (Kan<sup>r</sup>)  
477 bacterium in two different growth medium; (A) Tryptone Glucose Yeast extract (TGY), and  
478 (B) Luria Bertani (LB). Biofilms were evaluated after 24, 48 and 72 h of growth. Error bars are  
479 shown as  $\pm$  SD.

480 **Figure 2:** Confocal Laser Scanning Microscopic images of different days old *D. radiodurans*  
481 biofilm. (A) 24 h old biofilm (B) 48 h old biofilm (C) 72 h old biofilm (Kan<sup>r</sup>). (scale bar 10  
482  $\mu$ m).

483 **Figure 3:** Effect of different concentrations of calcium on *D. radiodurans* (Kan<sup>r</sup>) biofilm  
484 growth. Biofilms were evaluated after 48 h of growth. Error bars are shown as  $\pm$  SD.

485 **Figure 4:** Effect of the presence of the calcium on the different constituents of extracellular  
486 polymeric substances (EPS) in *D. radiodurans* (Kan<sup>r</sup>) biofilm.

487 **Figure 5.** Effect of Ca<sup>2+</sup> on bioremediation of heavy metals by *D. radiodurans* (Kan<sup>r</sup>) biofilm.  
488

**Table 1**

| <b>Age of <i>D. radiodurans</i> (Kan<sup>r</sup>) biofilm</b>             |                   |                   |                   |
|---------------------------------------------------------------------------|-------------------|-------------------|-------------------|
| <b>Biofilm parameters</b>                                                 | <b>24 h</b>       | <b>48 h</b>       | <b>72 h</b>       |
| <b>Total biomass (<math>\mu\text{m}^3/\mu\text{m}^2</math>)</b>           | 0.53 ± 0.39       | 1.63 ± 1.08       | 0.87 ± 0.65       |
| <b>Maximum thickness (<math>\mu\text{m}</math>)</b>                       | 8.34 ± 2.00       | 9.12 ± 0.50       | 10.99 ± 2.42      |
| <b>Avg. Thickness</b>                                                     | 2.22 ± 2.33       | 4.03 ± 2.54       | 3.19 ± 2.85       |
| <b>Avg. Colony size at substratum (<math>\mu\text{m}^2</math>)</b>        | 3.39 ± 1.40       | 4.14 ± 2.47       | 3.71 ± 1.76       |
| <b>Avg. Colony volume at substratum (<math>\mu\text{m}^3</math>)</b>      | 1335.16 ± 1119.19 | 5267.83 ± 5327.12 | 2387.15 ± 2467.58 |
| <b>Surface to volume ratio (<math>\mu\text{m}^2/\mu\text{m}^3</math>)</b> | 3.24 ± 0.22       | 4.72 ± 0.93       | 4.31 ± 1.3        |
| <b>Roughness coefficient</b>                                              | 1.55 ± 0.32       | 1.00 ± 0.59       | 1.34 ± 0.47       |

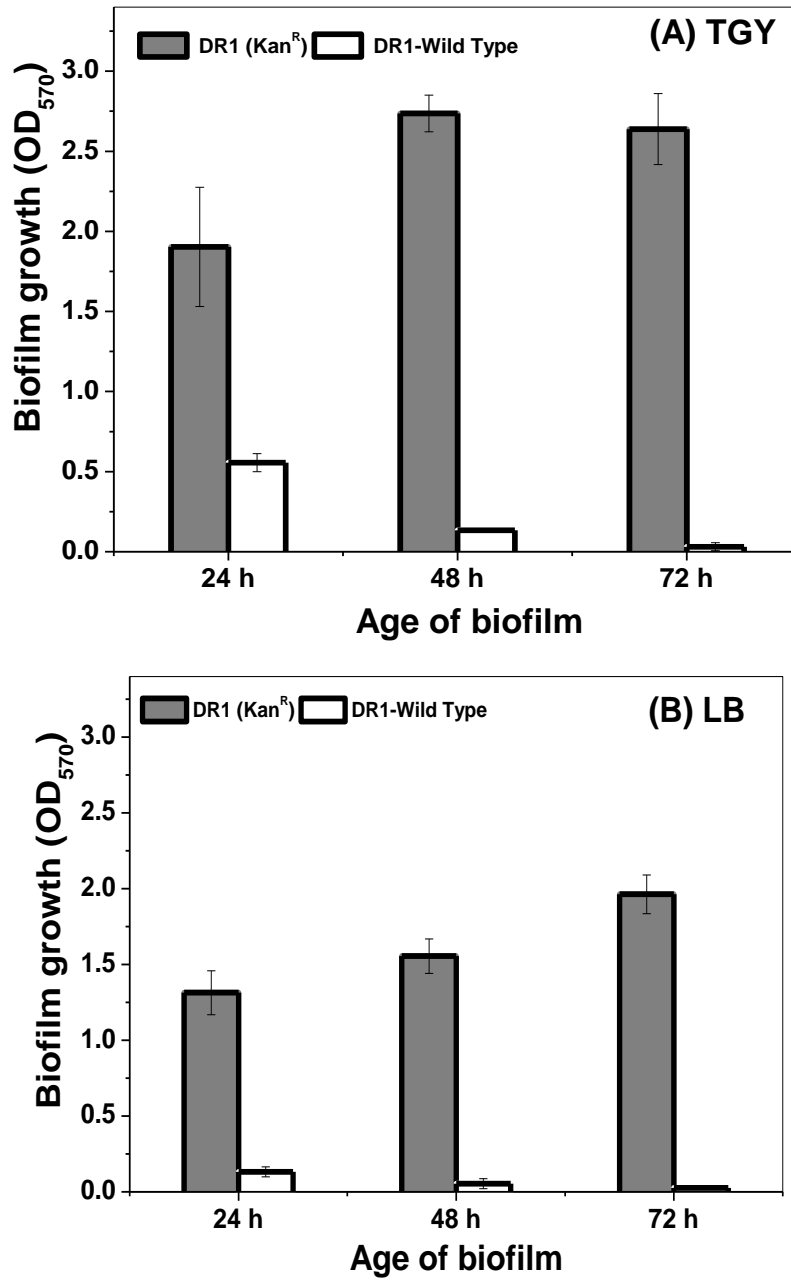

Figure 1

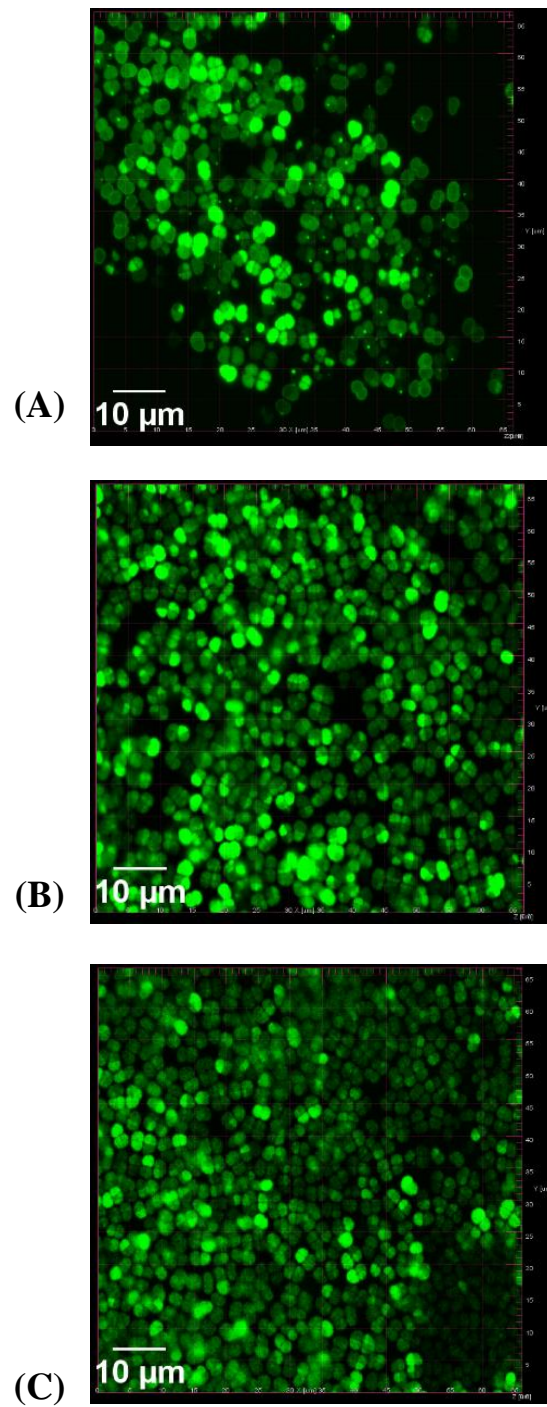

**Figure 2**



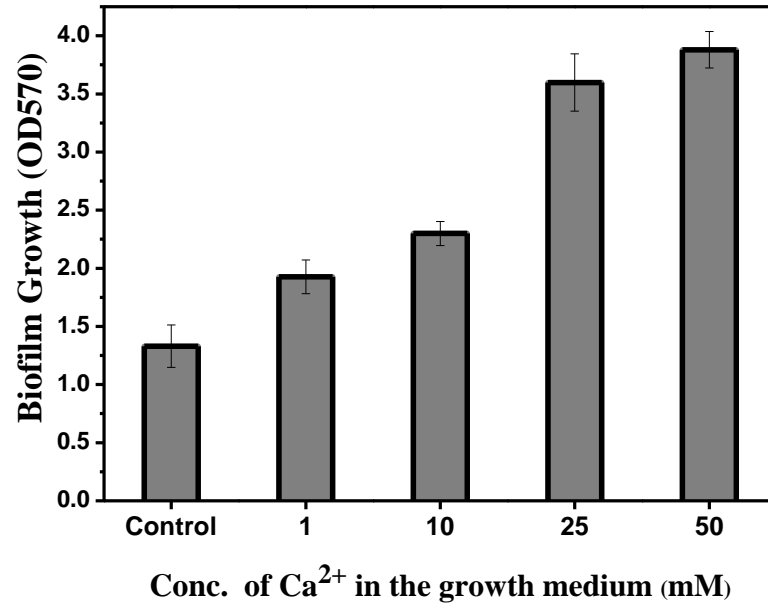

**Figure 3**

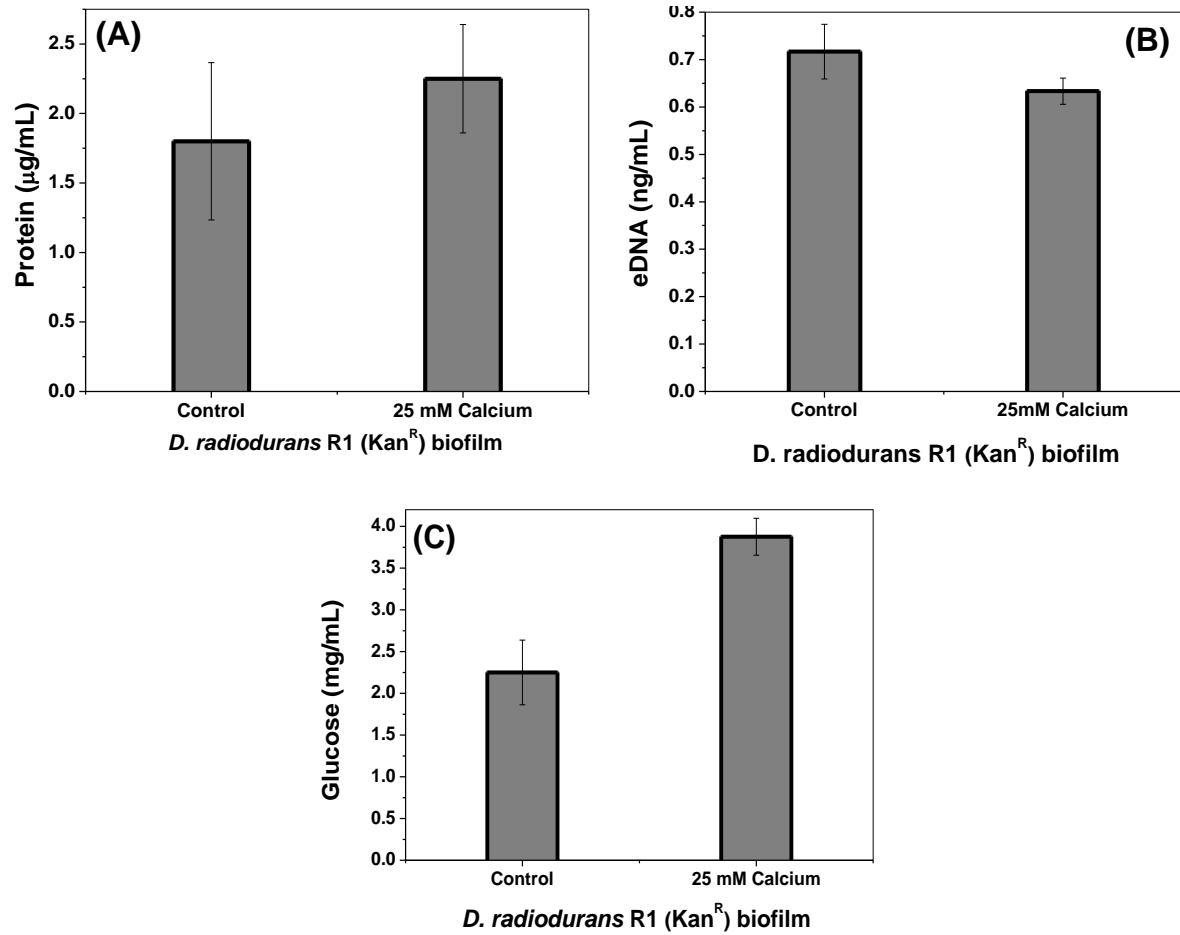

Figure 4

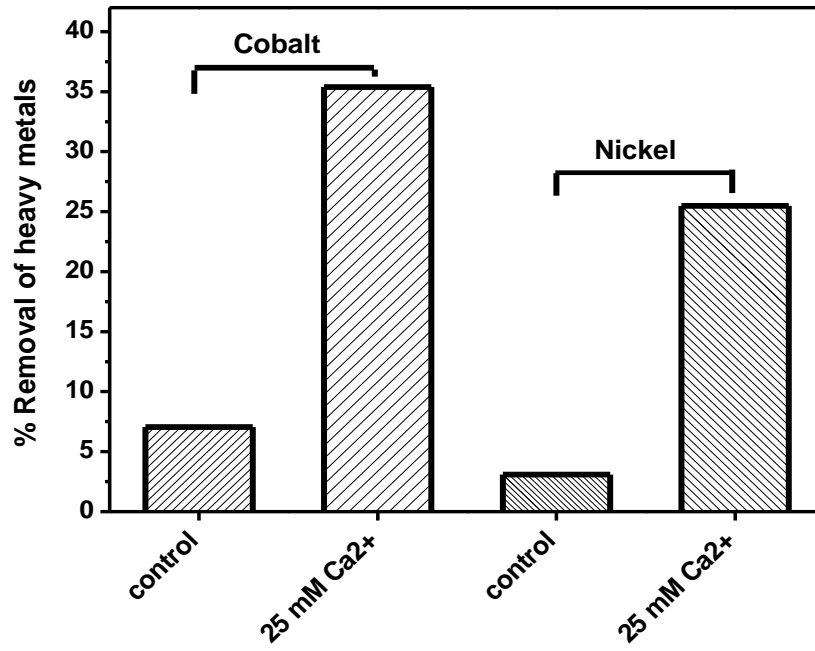

Figure 5
